# Supplementary material for: Impact of the use of Information Technology on Employee stress level and Job satisfaction in the banking and financial sector of Sri Lanka
Source: Royal Society of Chemistry journal article supplement (doi:10.1039/d0fo01262a), 2008-01-01
Supplement: d0fo01262a3.pdf [file d0fo01262a3.pdf]

## Supplementary Information

### 1 Supplementary Tables

Table S1 Calculated Secondary Structure Fractions

Table S2 Summary of fluorescence spectroscopy statistics

### 2 Supplementary Figures

Figure S1 LC-MS/MS chromatograms of compound 2, 4 and 17 in Table 1.

Figure S2 Binding Conformations of 16 anthocyanin analogues with the pancreatic lipase.

### 3 Supplementary Movies

Movie 1 Conformation analysis of pancreatic lipase and C3A complex

Movie 2 Interaction analysis of C3A with pancreatic lipase

## 1 Supplementary Tables

**Table S1 Calculated Secondary Structure Fractions**

| C3A<br>( $\mu\text{M}$ )         | C3Ga<br>( $\mu\text{M}$ ) |      |      | Pn3A<br>( $\mu\text{M}$ ) |      |      | Pn3Ga<br>( $\mu\text{M}$ ) |      |      |      |      |      |
|----------------------------------|---------------------------|------|------|---------------------------|------|------|----------------------------|------|------|------|------|------|
|                                  | 0                         | 100  | 200  | 0                         | 100  | 200  | 0                          | 100  | 200  | 0    | 100  | 200  |
| <b><math>\alpha</math>-helix</b> | 0.49                      | 0.46 | 0.18 | 0.48                      | 0.47 | 0.39 | 0.51                       | 0.52 | 0.50 | 0.41 | 0.50 | 0.53 |
| <b><math>\beta</math>-strand</b> | 0.00                      | 0.03 | 0.08 | 0.01                      | 0.00 | 0.03 | 0.01                       | 0.00 | 0.00 | 0.00 | 0.01 | 0.00 |
| <b><math>\beta</math>-turn</b>   | 0.16                      | 0.15 | 0.16 | 0.15                      | 0.17 | 0.16 | 0.14                       | 0.17 | 0.14 | 0.19 | 0.15 | 0.12 |
| <b><math>\beta</math>-total</b>  | 0.16                      | 0.17 | 0.25 | 0.16                      | 0.17 | 0.18 | 0.16                       | 0.17 | 0.15 | 0.19 | 0.16 | 0.13 |
| <b>unordered</b>                 | 0.35                      | 0.37 | 0.58 | 0.36                      | 0.36 | 0.43 | 0.34                       | 0.30 | 0.35 | 0.40 | 0.34 | 0.34 |

**Table S2 Summary of fluorescence spectroscopy statistics**

|                                                |       | <b>C3A</b> |       | <b>C3Ga</b> | <b>Pn3A</b> | <b>Pn3Ga</b> |
|------------------------------------------------|-------|------------|-------|-------------|-------------|--------------|
| <b>Temperature (K)</b>                         | 310   | 320        | 330   | 310         | 310         | 310          |
| <b>K<sub>q</sub> (10<sup>13</sup> L/mol·s)</b> | 5.72  | 3.14       | 4.32  | 4.51        | 5.20        | 4.32         |
| <b>K<sub>a</sub> (10<sup>4</sup> L/mol)</b>    | 80.2  | 47.8       | 18.8  | 2.98        | 9.98        | 68.5         |
| <b>n</b>                                       | 1.03  | 1.03       | 0.93  | 0.80        | 0.90        | 1.03         |
| <b>ΔH (kJ/mol)</b>                             |       | -61.5      |       | -           | -           | -            |
| <b>ΔS (J/mol)</b>                              |       | -84.9      |       | -           | -           | -            |
| <b>ΔG (kJ/mol)</b>                             | -35.2 | -34.4      | -33.5 | -           | -           | -            |

## 2 Supplementary Figures

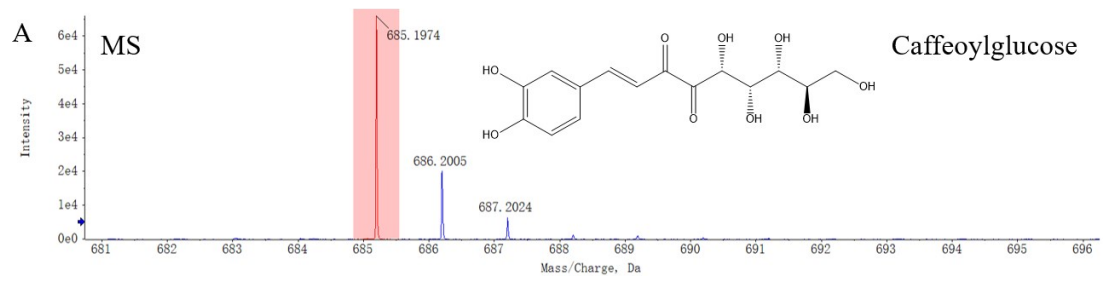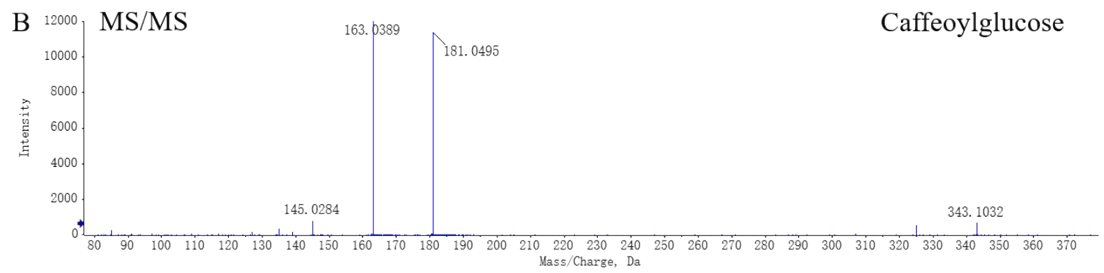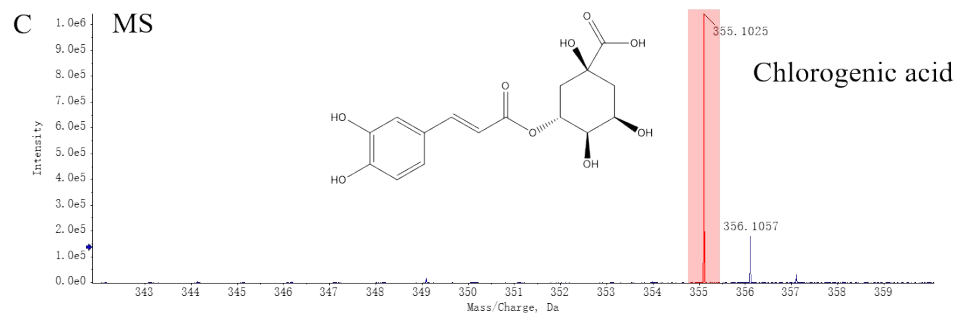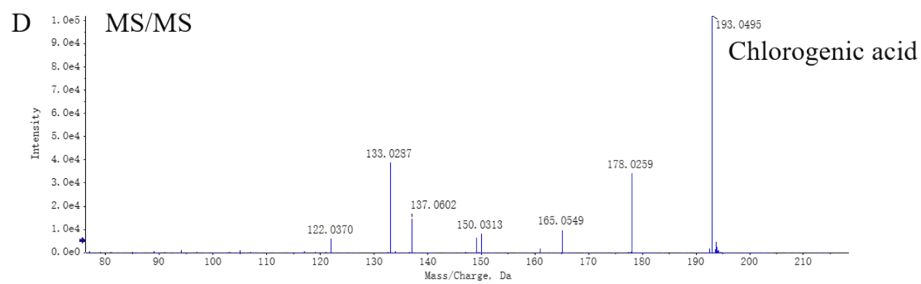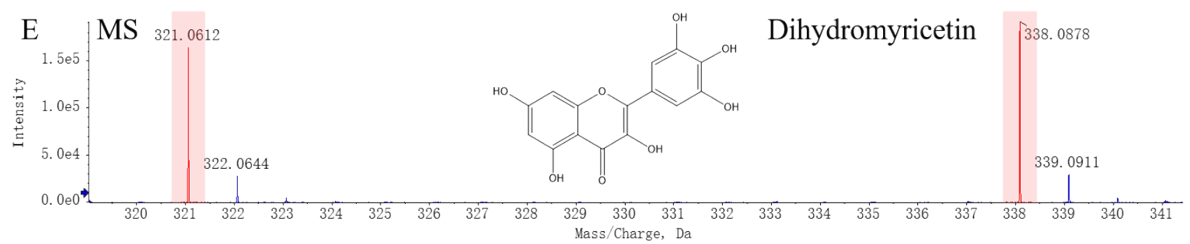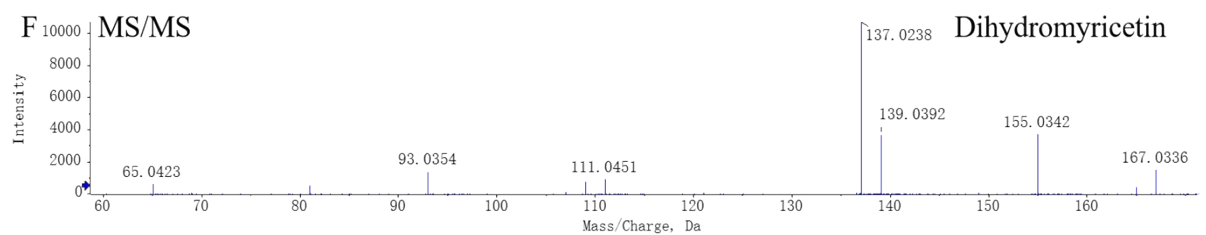

**Figure S1.** LC-MS/MS chromatograms of compound 2, 4 and 17 in Table 1. A. MS chromatogram of compound 2 (identified as caffeoylglucose). B. MS/MS chromatogram of compound 2 (identified as caffeoylglucose). C. MS chromatogram of compound 4 (identified as chlorogenic acid). D. MS/MS chromatogram of compound 4 (identified as chlorogenic acid). E. MS chromatogram of compound 17 (identified as dihydromyricetin). F. MS/MS chromatogram of compound 17 (identified as dihydromyricetin).

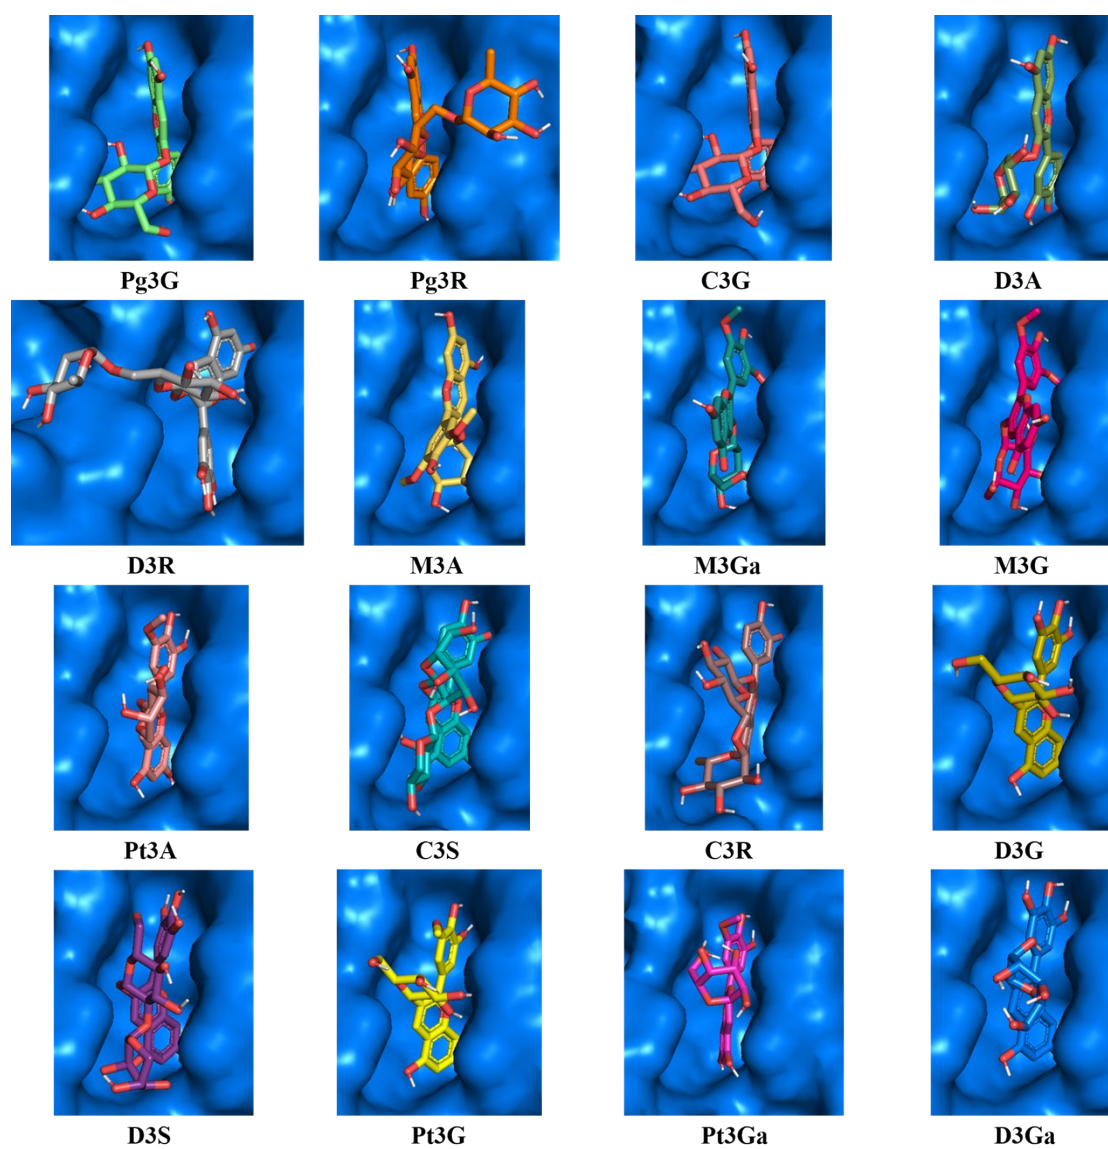

**Figure S2.** Binding Conformations of 16 anthocyanin analogues with the pancreatic lipase. Type A conformation: Pg3G, Pg3R, C3G, D3A and D3R. Type B conformation: M3A. Type C conformation: M3Ga and M3G. Type D conformation: Pt3A, C3S, C3R, D3G, D3S, Pt3G, Pt3Ga and D3Ga.
